# Supplementary material for: The giant staphylococcal protein Embp facilitates colonization of surfaces through Velcro-like attachment to fibrillated fibronectin
Source: eLife. 2022 Jul 7;11:e76164. doi: 10.7554/eLife.76164 (PMC9302970; doi:10.7554/eLife.76164)
Supplement: Figure 4—source data 1. [file elife-76164-fig4-data1.xlsx]

## Sheet: Figure 3 source data
Cells per field of view									Univariate scatter plot				Univariate scatter plot
Group	Replica number	PMA	PMA + Fn	PEA	PEA + Fn	PEA + Fn + IgG FNIII 12th -14th	PEA + Fn + IgG FNIII 5th		Group	Sample	Bacteria/mm2	X axis	Group	Sample	Bacteria/mm2	X axis
FG	1	80	93	81	1288	476	1301		F	PMA	286.721	0.5	FG	PMA	337.319	0.5
FG	2	89	102	97	1349	421	1387		F	PMA	341.536	0.6	FG	PMA	375.268	0.6
FG	3	77	89	109	1205	498	1416		F	PMA	261.422	0.4	FG	PMA	324.67	0.4
FG	4	95	105						F	PMA	307.804	0.45	FG	PMA	400.567	0.45
FG	5	101	113						F	PMA	358.402	0.65	FG	PMA	425.866	0.65
FG	6	66	74						F	PMA	286.721	0.7	FG	PMA	278.288	0.7
F	1	68	71	65	1064	425	1173		F	PMA + Fn	299.371	1.5	FG	PMA + Fn	392.134	1.5
F	2	81	89	69	1043	391	1105		F	PMA + Fn	375.268	1.6	FG	PMA + Fn	430.082	1.7
F	3	62	63	72	1204	454	1234		F	PMA + Fn	265.639	1.4	FG	PMA + Fn	375.268	1.4
F	4	73	84						F	PMA + Fn	354.185	1.45	FG	PMA + Fn	442.732	1.45
F	5	85	99						F	PMA + Fn	417.433	1.65	FG	PMA + Fn	476.464	1.65
F	6	68	73						F	PMA + Fn	307.804	1.7	FG	PMA + Fn	312.02	1.6
									F	PEA	274.072	2.5	FG	PEA	341.536	2.5
									F	PEA	290.938	2.6	FG	PEA	409	2.7
									F	PEA	303.587	2.4	FG	PEA	459.598	2.4
Area of the field of view (um2)	237164								F	PEA + Fn	4486.35	3.5	FG	PEA + Fn	5430.84	3.5
Cells per mm2									F	PEA + Fn	4397.8	3.6	FG	PEA + Fn	5688.05	3.7
Group	Replicate sample	PMA	PMA + Fn	PEA	PEA + Fn	PEA + Fn + IgG FNIII 12th -14th	PEA + Fn + IgG FNIII 5th		F	PEA + Fn	5076.66	3.4	FG	PEA + Fn	5080.87	3.4
FG	1	337.319	392.134	341.536	5430.84	2007.05	5485.66		F	PEA + Fn + IgG FNIII 12th -14th	1792.01	4.5	FG	PEA + Fn + IgG FNIII 12th -14th	2007.05	4.5
FG	2	375.268	430.082	409	5688.05	1775.14	5848.27		F	PEA + Fn + IgG FNIII 12th -14th	1648.65	4.6	FG	PEA + Fn + IgG FNIII 12th -14th	1775.14	4.7
FG	3	324.67	375.268	459.598	5080.87	2099.81	5970.55		F	PEA + Fn + IgG FNIII 12th -14th	1914.29	4.4	FG	PEA + Fn + IgG FNIII 12th -14th	2099.81	4.4
FG	4	400.567	442.732						F	PEA + Fn + IgG FNIII 5th	4945.94	5.5	FG	PEA + Fn + IgG FNIII 5th	5485.66	5.5
FG	5	425.866	476.464						F	PEA + Fn + IgG FNIII 5th	4659.22	5.6	FG	PEA + Fn + IgG FNIII 5th	5848.27	5.7
FG	6	278.288	312.02						F	PEA + Fn + IgG FNIII 5th	5203.15	5.4	FG	PEA + Fn + IgG FNIII 5th	5970.55	5.4
F	1	286.721	299.371	274.072	4486.35	1792.01	4945.94
F	2	341.536	375.268	290.938	4397.8	1648.65	4659.22				Sample pleans				Sample pleans
F	3	261.422	265.639	303.587	5076.66	1914.29	5203.15
F	4	307.804	354.185						F	PMA	307.101	0.5	FG	PMA	356.996	0.5
F	5	358.402	417.433						F	PMA + Fn	336.617	1.5	FG	PMA + Fn	404.783	1.5
F	6	286.721	307.804						F	PEA	289.532	2.5	FG	PEA	403.378	2.5
									F	PEA + Fn	4653.6	3.5	FG	PEA + Fn	5399.92	3.5
Calculation of mean									F	PEA + Fn + IgG FNIII 12th -14th	1784.98	4.5	FG	PEA + Fn + IgG FNIII 12th -14th	1960.67	4.5
Group		PMA	PMA + Fn	PEA	PEA + Fn	PEA + Fn + IgG FNIII 12th -14th	PEA + Fn + IgG FNIII 5th		F	PEA + Fn + IgG FNIII 5th	4936.11	5.5	FG	PEA + Fn + IgG FNIII 5th	5768.16	5.5
FG		356.996	404.783	403.378	5399.92	1960.67	5768.16
F		307.101	336.617	289.532	4653.6	1784.98	4936.11
Standard Deviation
Group		PMA	PMA + Fn	PEA	PEA + Fn	PEA + Fn + IgG FNIII 12th -14th	PEA + Fn + IgG FNIII 5th
FG		26.332	28.0748	59.2313	304.766	167.231	252.18
F		40.9528	56.1496	14.8078	369.041	132.959	272.097
Statistical test (Two-tailed T test)						F modules	FG modules
Research question		samples to be compared				P value	P value
Does fibrillated Fn increase adhesion?		PEA vs PEA + Fn				0.00223694	0.00152688
Does antibody blocking of FNIII 12-14 prevent adhesion?		PEA + Fn + IgG FNIII 12th -14th vs PEA+Fn				0.0026414	0.00606695
Does antibody blocking prevent adhesion if binding elswhere on Fn?		PEA + Fn + IgG FNIII 5th vs PEA+Fn				0.0999749	0.295745
