# Supplementary material for: The giant staphylococcal protein Embp facilitates colonization of surfaces through Velcro-like attachment to fibrillated fibronectin
Source: eLife. 2022 Jul 7;11:e76164. doi: 10.7554/eLife.76164 (PMC9302970; doi:10.7554/eLife.76164)
Supplement: Figure 7—source data 1. [file elife-76164-fig7-data1.xlsx]

## Sheet: Adhesion
Cells pr image										Univariate scatter plot
Group	Flow rate adhesion	Flow rate wash	Replica #	Image #	Pxyl/tet_embp on PEA + Fn	Pxyl/tet_embp on PEA	∆embp on PEA + Fn	∆embp on PEA		Group	Embp	Fn	Label	Cells/mm2	x axis
High flow	18	36	1	1	315	12	11	6		High flow	+	+	Embp Fn H	1341.76	4.4
High flow	18	36	1	2	352	8	6	8		High flow	+	+		1466.67	4.5
High flow	18	36	1	3	289	10	7	5		High flow	+	+		1469.48	4.6
High flow	18	36	2	1	315	8	8	9		High flow	+		Embp H	42.1055	5.4
High flow	18	36	2	2	352	5	6	11		High flow	+			26.6668	5.5
High flow	18	36	2	3	378	6	13	4		High flow	+			70.1758	5.6
High flow	18	36	3	1	315	15	12	5		High flow		+	Fn H	33.6844	6.4
High flow	18	36	3	2	398	14	4	4		High flow		+		37.8949	6.5
High flow	18	36	3	3	334	21	9	11		High flow		+		35.0879	6.6
Low flow	1	5	1	1	1344	16	1176	126		High flow			h	26.6668	7.4
Low flow	1	5	1	2	1491	45	1176	42		High flow				33.6844	7.5
Low flow	1	5	1	3	1428	31	1386	3		High flow				28.0703	7.6
Low flow	1	5	2	1	1533	21	1407	18		Low flow	+	+	Embp Fn L	5983.19	0.4
Low flow	1	5	2	2	1407	17	1071	84		Low flow	+	+		6042.14	0.5
Low flow	1	5	2	3	1365	19	1302	23		Low flow	+	+		6720.03	0.6
Low flow	1	5	3	1	1596	53	1044	12		Low flow	+		Embp L	129.123	1.4
Low flow	1	5	3	2	1449	27	1155	8		Low flow	+			80.0004	1.5
Low flow	1	5	3	3	1743	43	1344	14		Low flow	+			172.632	1.6
										Low flow		+	Fn L	5246.34	2.4
Conversion to cells/mm2		Images pr mm2	4.21055							Low flow		+		5305.29	2.5
Group	Flow rate adhesion	Flow rate wash	Replica #	Image #	Pxyl/tet_embp on PEA + Fn	Pxyl/tet_embp on PEA	∆embp on PEA + Fn	∆embp on PEA		Low flow		+		4972.66	2.6
High flow	18	36	1	1	1326.32	50.5266	46.316	25.2633		Low flow			L	240.001	3.4
High flow	18	36	1	2	1482.11	33.6844	25.2633	33.6844		Low flow				175.439	3.5
High flow	18	36	1	3	1216.85	42.1055	29.4738	21.0527		Low flow				47.7195	3.6							0.4
High flow	18	36	2	1	1326.32	33.6844	33.6844	37.8949														0.5
High flow	18	36	2	2	1482.11	21.0527	25.2633	46.316		Mean			Mean Embp Fn H	1425.97	4.5	0.228212	attachment rate at high flow compared to low flow					0.6
High flow	18	36	2	3	1591.59	25.2633	54.7371	16.8422		Mean			Mean Embp H	46.316	5.5							1.4
High flow	18	36	3	1	1326.32	63.1582	50.5266	21.0527		Mean			Mean Fn H	35.5557	6.5							1.5
High flow	18	36	3	2	1675.8	58.9477	16.8422	16.8422		Mean			Mean H	29.4738	7.5							1.6
High flow	18	36	3	3	1406.32	88.4215	37.8949	46.316		Mean			Mean Embp Fn L	6248.45	0.5	0.207486	increase in attachment for Embp vs no Embp (at low flow)					2.4
Low flow	1	5	1	1	5658.98	67.3688	4951.6	530.529		Mean			Mean Embp L	127.252	1.5							2.5
Low flow	1	5	1	2	6277.93	189.475	4951.6	176.843		Mean			Mean Fn L	5174.76	2.5		0.5					2.6
Low flow	1	5	1	3	6012.66	130.527	5835.82	12.6316		Mean			Mean L	154.387	3.5		1.5					3.4
Low flow	1	5	2	1	6454.77	88.4215	5924.24	75.7899									2.5					3.5
Low flow	1	5	2	2	5924.24	71.5793	4509.5	353.686		P values		Strains with Embp	Strains without Embp				3.5					3.6
Low flow	1	5	2	3	5747.4	80.0004	5482.13	96.8426		Does Fn increase adhesion?	High flow	0.000375952	0.0858084
Low flow	1	5	3	1	6720.03	223.159	4395.81	50.5266			Low flow	0.00132004	2.02231e-05
Low flow	1	5	3	2	6101.08	113.685	4863.18	33.6844				Samples with Fn	Samples without Fn
Low flow	1	5	3	3	7338.98	181.054	5658.98	58.9477		Does Embp lead to more adhesion?	High flow	0.000907941	0.316115
											Low flow	0.0302504	0.694942
Average of technical replicates
Group	Flow rate adhesion	Flow rate wash	Replica #	Image #	Pxyl/tet_embp on PEA + Fn	Pxyl/tet_embp on PEA	∆embp on PEA + Fn	∆embp on PEA		Two tailed T tests
High flow	18	36	1	mean of 3	1341.76	42.1055	33.6844	26.6668
High flow	18	36	2	mean of 3	1466.67	26.6668	37.8949	33.6844
High flow	18	36	3	mean of 3	1469.48	70.1758	35.0879	28.0703
Low flow	1	5	1	mean of 3	5983.19	129.123	5246.34	240.001
Low flow	1	5	2	mean of 3	6042.14	80.0004	5305.29	175.439
Low flow	1	5	3	mean of 3	6720.03	172.632	4972.66	47.7195
Statistical analyses (mean, S.D., and P values from two-tailed T test)
Group	Flow rate adhesion	Flow rate wash	Replica #	Image #	Pxyl/tet_embp on PEA + Fn	Pxyl/tet_embp on PEA	∆embp on PEA + Fn	∆embp on PEA
High flow	18	36	mean of 3		1425.97	46.316	35.5557	29.4738
Low flow	1	5	mean of 3		6248.45	127.252	5174.76	154.387
High flow	18	36	SD of mean		72.9423	22.058	2.14391	3.71335
Low flow	1	5	SD of mean		409.464	46.3444	177.493	97.8544
		Strains with Embp	Strains without Embp
Does Fn increase adhesion?	High flow	0.000911867	0.0228602
	Low flow	0.00123566	0.000140755
		Samples with Fn	Samples without Fn
Does Embp lead to more adhesion?	High flow	0.000876937	0.357348
	Low flow	0.0859276	0.755685

## Sheet: Shear stress calculation
Shear stress		τ = η ∙ 176.1 ∙ Φ
Shear stress	Viscosity	Flowrate	Flowrate
dyn/cm2	dyn x s/cm2	ml/h	ml/min
0.5283	0.01	18	0.3
1.0566	0.01	36	0.6
0.02935	0.01	1	0.0166667
0.14675	0.01	5	0.0833333

## Sheet: DLS measurements
			Measurement of zeta potential									Measurement of hydrodynamic radisu
Record	Type	Sample Name	Measurement Date and Time	T (∞C)		ZP (mV)	Mob (µmcm/Vs)	Cond (mS/cm)		Record	Type	Sample name	T ©	Z-ave (d.nm)	pdl	Pk1 mean (d.nm)
1	Replika 1: 1	Pxyl/tetEmbp 1 1	7. oktober 2020 14:50:04	25		-10.3	-0.806	15.8		1	Replika 1: 1	Size	Pxyl/tet		1902		1676
2	Replika 1: 2	Pxyl/tetEmbp 1 2	7. oktober 2020 14:51:37	25		-11.1	-0.8679	17.2		2	Replika 1: 2	Size	Pxyl/tet		2034		2317
3	Replika 1: 3	Pxyl/tetEmbp 1 3	7. oktober 2020 14:51:57	25		-13.6	-1.068	17.6		3	Replika 1: 3	Size	Pxyl/tet		2036		1262
4	Replika 2: 1	Pxyl/tetEmbp 2 1	7. oktober 2020 14:56:47	25		-10.6	-0.8283	16.2		4	Replika 2: 1	Size	Pxyl/tet		2906		1137
5	Replika 2: 2	Pxyl/tetEmbp 2 2	7. oktober 2020 14:57:56	25		-10.8	-0.8477	16.9		5	Replika 2: 2	Size	Pxyl/tet		2599		1002
6	Replika 2: 3	Pxyl/tetEmbp 2 3	7. oktober 2020 14:58:16	25		-13.7	-1.071	17.4		6	Replika 2: 3	Size	Pxyl/tet		2563		1167
7	Replika 3:1	Pxyl/tetEmbp 3 1	7. oktober 2020 15:01:39	25	-11.6667	-11.2	-0.8788	15.6		7	Replika 3:1	Size	Pxyl/tet	1990.67	2133		2053
8	Replika 3:2	Pxyl/tetEmbp 3 2	7. oktober 2020 15:02:49	25	-11.7	-10.6	-0.8342	16.3		8	Replika 3:2	Size	Pxyl/tet	2689.33	2780		2605
9	Replika 3:3	Pxyl/tetEmbp 3 3	7. oktober 2020 15:03:11	25	-11.1	-11.5	-0.9007	16.8		9	Replika 3:3	Size	Pxyl/tet	2329	2074		2129
10	Replika 1:1	DeltaEmbp 1 1	7. oktober 2020 15:06:47	25		-14.8	-1.164	15.7		10	Replika 1:1	Size	∆Embp		1195		1350
11	Replika 1:2	DeltaEmbp 1 2	7. oktober 2020 15:08:05	25		-16.2	-1.268	16.8		11	Replika 1:2	Size	∆Embp		1253		1471
12	Replika 1:3	DeltaEmbp 1 3	7. oktober 2020 15:08:25	25		-17.3	-1.353	17.2		12	Replika 1:3	Size	∆Embp		1050		1071
13	Replika2 :1	DeltaEmbp 2 1	7. oktober 2020 15:11:14	25		-12.8	-1.006	15.5		13	Replika2 :1	Size	∆Embp		1367		1493
14	Replika2 :2	DeltaEmbp 2 2	7. oktober 2020 15:12:23	25		-14.2	-1.117	16.1		14	Replika2 :2	Size	∆Embp		1429		1559
15	Replika2 :3	DeltaEmbp 2 3	7. oktober 2020 15:12:44	25		-13.2	-1.036	16.7		15	Replika2 :3	Size	∆Embp		1120		1260
16	Replika3 :1	DeltaEmbp 3 1	7. oktober 2020 15:15:40	25	-16.1	-13.8	-1.08	15.4		16	Replika3 :1	Size	∆Embp	1166	1359		1493
17	Replika3 :2	DeltaEmbp 3 2	7. oktober 2020 15:16:49	25	-13.4	-14.1	-1.107	16.1		17	Replika3 :2	Size	∆Embp	1305.33	1599		1592
18	Replika3 :3	DeltaEmbp 3 3	7. oktober 2020 15:17:10	25	-14.3	-15	-1.175	16.7		18	Replika3 :3	Size	∆Embp	1364.67	1136		1216
													Hydrodynamic radius	SD	P-value from two tailed t-test
	ZP(mV)	Mob (µmcm/Vs)	Cond (mS/cm)	ZP (mV)	SD	P-value from two tailed t-test					Pxyl/tet embp		2336.33	349.391	0.0243345
Pxyl/tet Embp averages:	-11.4889	-0.900289	16.6444	-11.4889	0.424264	0.058886					∆Embp		1278.67	174.981
∆Embp Averages:	-14.6	-1.14511	16.2444	-14.6	1.52386
